# Supplementary material for: State-selective modulation of heterotrimeric Gαs signaling with macrocyclic peptides
Source: PubMed Central journal article supplement (PMC9747239; doi:10.1016/j.cell.2022.09.019), 2022-09-27
Supplement: NIHMS1837800-supplement-3.pdf [file NIHMS1837800-supplement-3.pdf]

# Supplemental figures

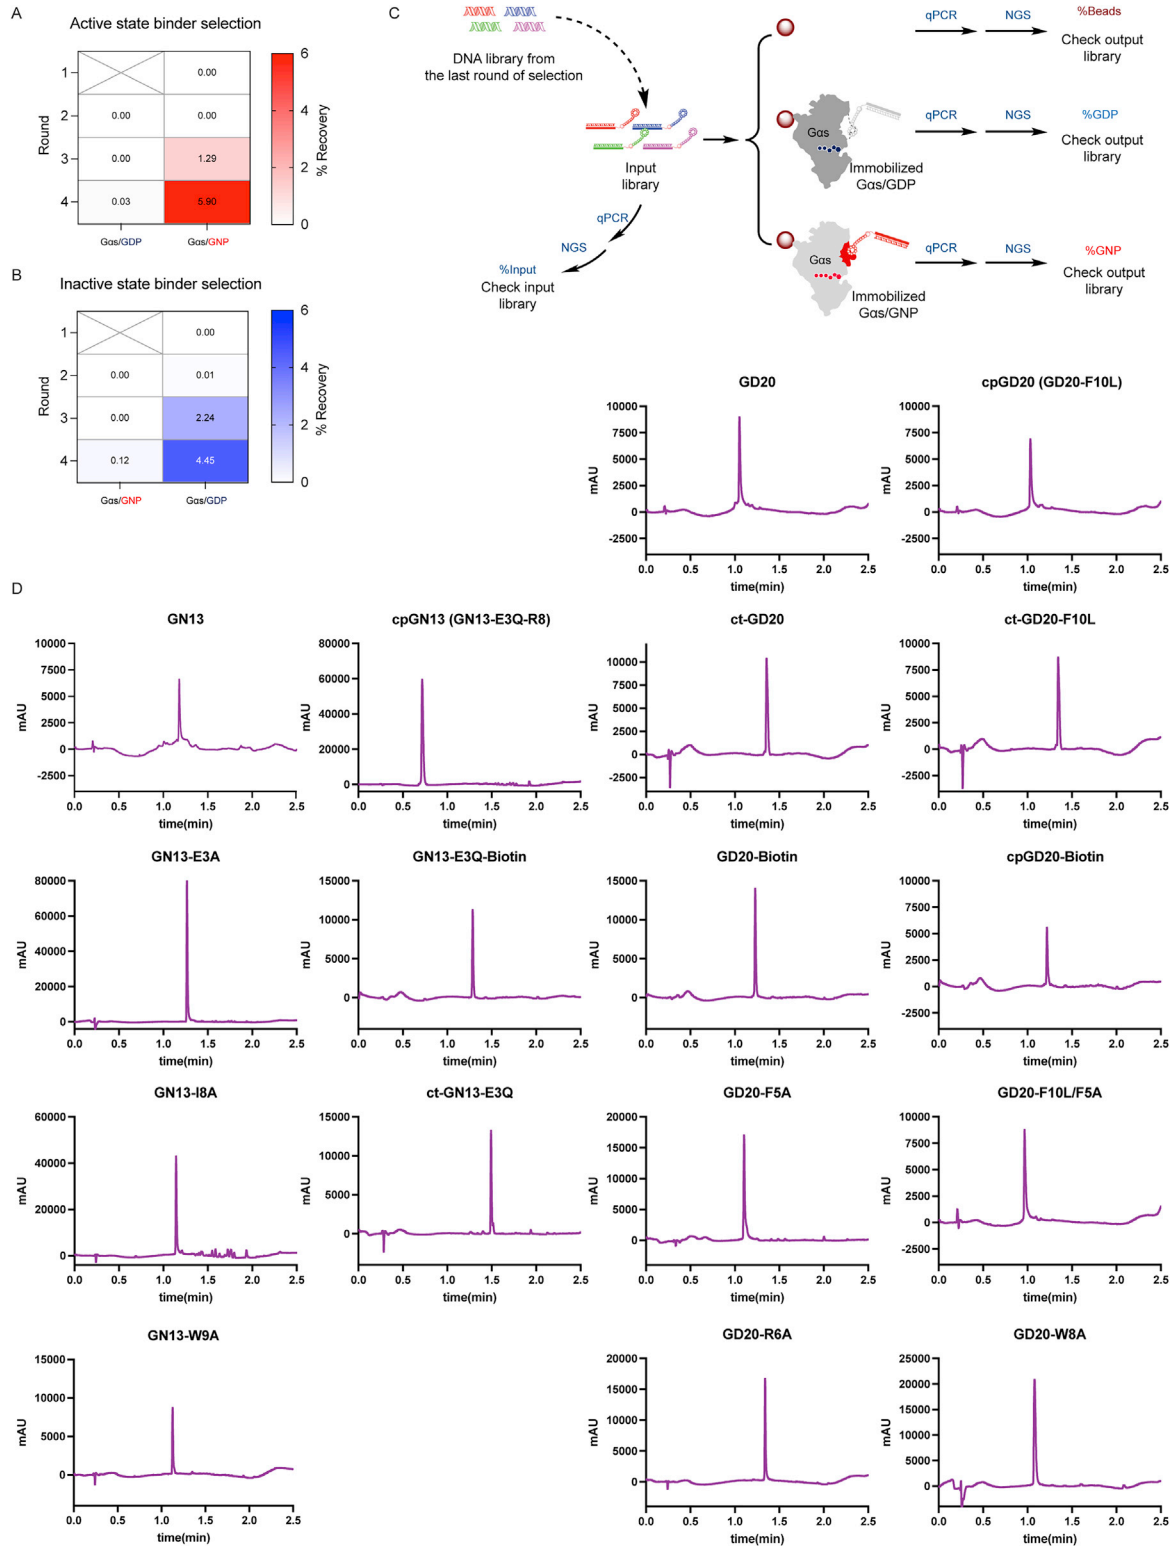

(legend on next page)

---

**Figure S1. RaPID selection of state-selective G $\alpha$ s binding cyclic peptides, related to Figure 1**

(A and B) The percentage of enriched peptide-mRNA-cDNA complex in the input library after each selection was quantified by qPCR. Cyclic peptides that bind to GNP-bound (A) or GDP-bound (B) G $\alpha$ s were enriched through R1-R4. To ensure a maximum library diversity at the initial stage of selection, negative selection was not included in the first round of selection.

(C) Comparison selection. DNA sequences of cyclic peptide binders from the R4 pools were quantified and identified by qPCR and NGS. A peptide-mRNA-cDNA complex library was produced based on the above-mentioned DNA sequences and equally split into three fractions. Binding of each individual peptide-mRNA-cDNA complex to blank, GDP-bound G $\alpha$ s-immobilized or GNP-bound G $\alpha$ s-immobilized beads was quantified by qPCR and NGS, respectively.

(D) Analytical HPLC Traces of resynthesized cyclic peptides. Absorbance was recorded at 280 nm.

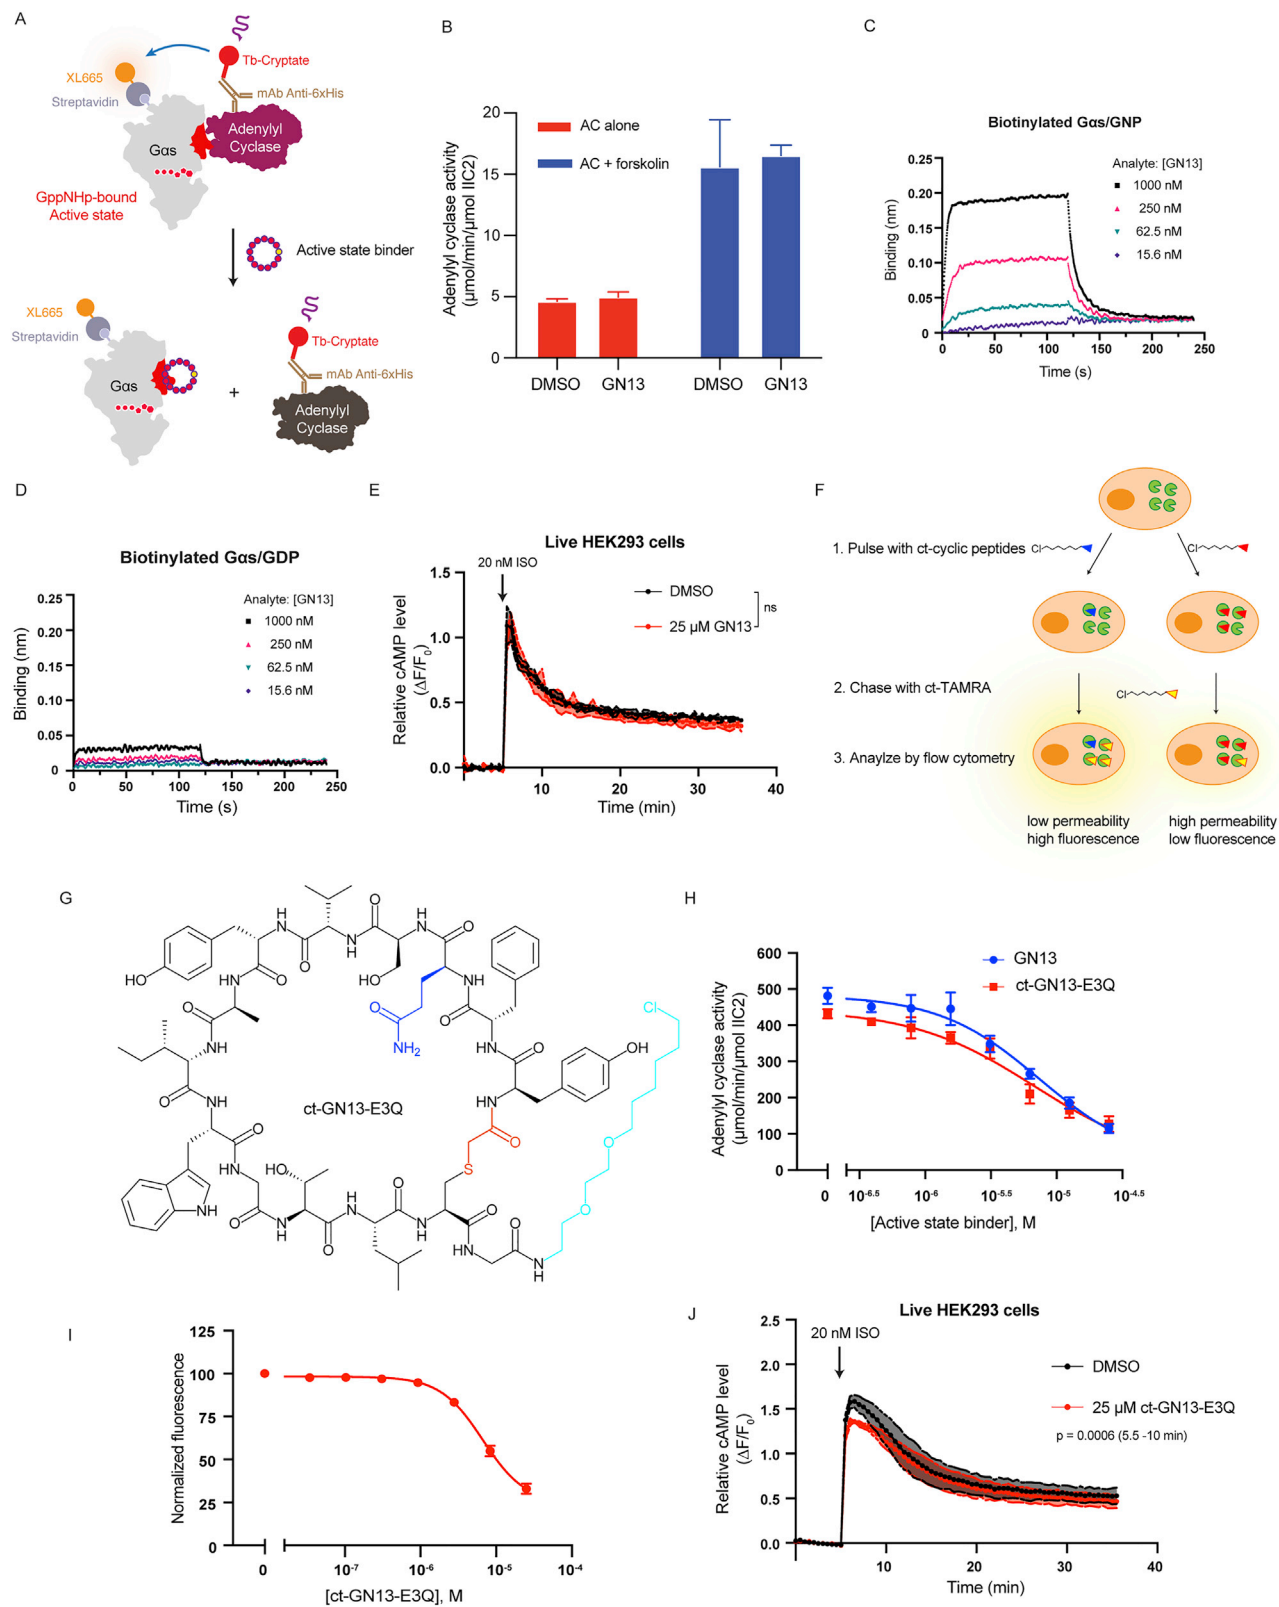

(legend on next page)

---

**Figure S2.  $G\alpha_s$  active-state inhibitor GN13 inhibits  $G\alpha_s$ -mediated adenylyl cyclase activation, related to Figure 2**

(A) Illustration of active-state binders inhibiting PPI between  $G\alpha_s$ /GNP and AC. (B) GN13 did not directly inhibit the intrinsic or forskolin-mediated AC activity in the absence of  $G\alpha_s$ . Mean  $\pm$  SE,  $n = 3$ .

(C and D) Binding kinetics of GN13 to GNP-bound (C) or GDP-bound (D)  $G\alpha_s$  were quantified using bio-layer Interferometry (BLI). Biotinylated  $G\alpha_s$  proteins were immobilized to give a relative intensity of 2–3 nm on streptavidin biosensors. Association ( $t = 0$ -120 s) and dissociation ( $t = 120$ -240 s) cycles of compounds were started by dipping sensors into cyclic peptide solutions and control buffer. Binding signals were reference-subtracted. The assay was performed in duplicate, and the data represent one of the two replicates.

(E) Pretreatment with GN13 for 24 h did not inhibit ISO-stimulated cAMP production in live HEK293 cells. Mean  $\pm$  SD,  $n = 3$ . Two-tailed unpaired  $t$  tests (data after 5 min). ns  $p > 0.05$ .

(F) Illustration of the chloroalkane penetration assay (CAPA).

(G) Structure of ct-GN13-E3Q. E3Q is colored blue. The ct tag is colored cyan.

(H) Activation of AC by  $G\alpha_s$  was inhibited by both GN13 and ct-GN13-E3Q in a dose-dependent manner. Mean  $\pm$  SE,  $n = 3$ .

(I) CAPA cell permeability assay result of ct-GN13-E3Q. Mean  $\pm$  SD,  $n = 3$ .

(J) Pretreatment with ct-GN13-E3Q for 24 h slightly inhibited ISO-stimulated cAMP production in live HEK293 cells. Mean  $\pm$  SD,  $n = 3$ . Two-tailed unpaired  $t$  tests (data between 5.5 and 10 min),  $p < 0.05$  was considered significant.

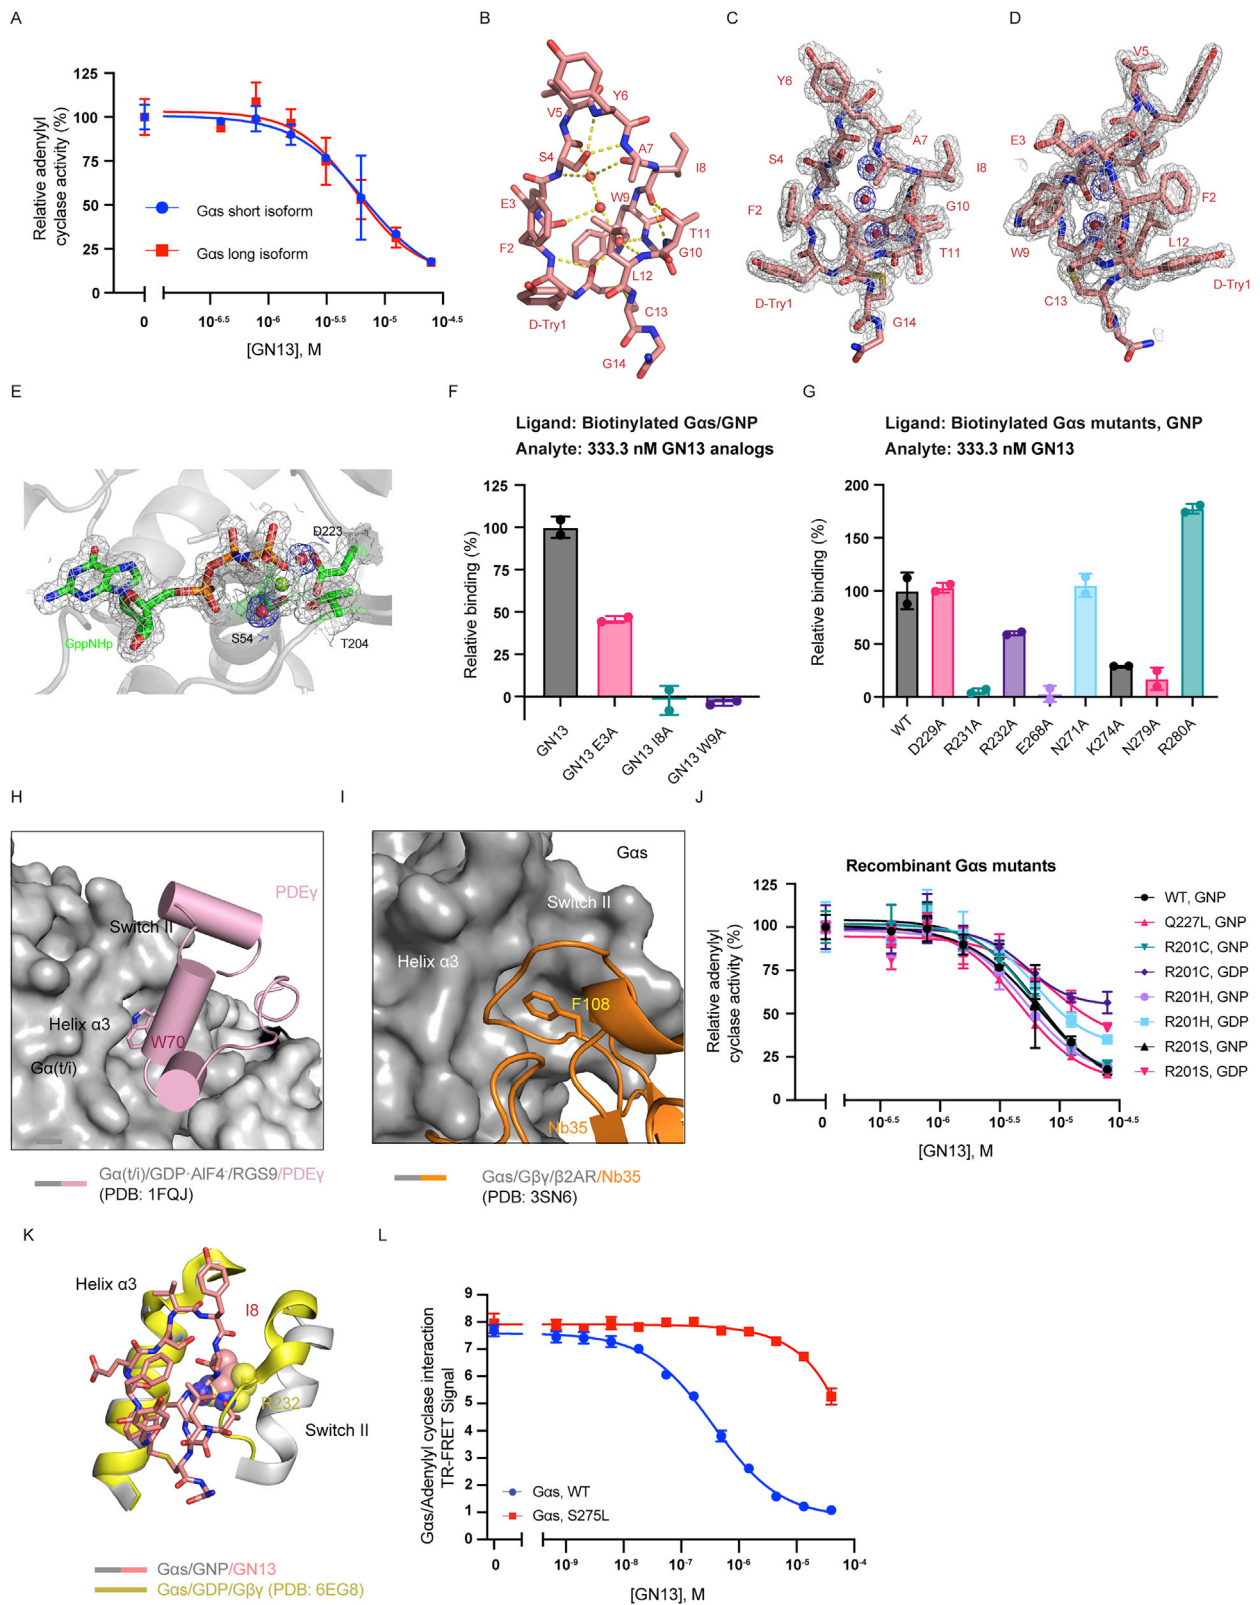

**Figure S3. GN13 specifically inhibits G $\alpha$ s through binding to a crystallographically defined pocket, related to Figure 3**

- (A) Activation of AC by both short and long isoforms of G $\alpha$ s was inhibited by GN13. AC activity was normalized to DMSO control group (100%). Mean  $\pm$  SD, n = 3.
- (B) GN13 adopts a highly ordered three-dimensional structure through an H-bond network. GN13 is shown as salmon sticks. Three water molecules with well-defined electron density are shown as red spheres. H-bonds are represented by yellow dash lines.
- (C and D) Electron density map of GN13. The *2mFo-DFc* electron density map of the structure is contoured at 1.0  $\sigma$  and colored gray (GN13) and blue (Water), respectively.
- (E) Electron density map of GNP. GNP and the side chains of S54, T204 and D223 are shown as sticks. The Mg<sup>2+</sup> and two water molecules coordinated with the Mg<sup>2+</sup> are shown as green and red spheres, respectively. The *2mFo-DFc* electron density map of the structure is contoured at 1.0  $\sigma$ .
- (F) Binding of GN13 analogs to WT G $\alpha$ s/ GNP were quantified using BLI. Biotinylated WT G $\alpha$ s/ GNP was immobilized to give a relative intensity of 2–3 nm on streptavidin biosensors, following the same association/dissociation cycles described in Figure S2C. Binding signals were double referenced and normalized to G $\alpha$ s loading and GN13/ G $\alpha$ s binding signal. Mean  $\pm$  SD, n = 2.
- (G) Binding of GN13 to different GNP-bound G $\alpha$ s mutants were quantified using BLI. Biotinylated GNP-bound G $\alpha$ s proteins were immobilized to give a relative intensity of 2–3 nm on streptavidin biosensors, following the same association/dissociation cycles described in Figure S2C. Binding signals were double referenced and normalized to G $\alpha$ s loading and GN13/ WT G $\alpha$ s binding signal. Mean  $\pm$  SD, n = 2.
- (H) Structure of the GDP•AIF4<sup>-</sup>-bound G $\alpha$ (t/i)/RGS9/PDE $\gamma$  complex (PDB: 1FQJ). A critical tryptophan residue from PDE $\gamma$  (pink, cartoon) engages the hydrophobic pocket between the switch II region and the  $\alpha$ 3 helix. G $\alpha$ (t/i) and RGS9 are shown as surface. PDE $\gamma$  is shown as cartoon.
- (I) Structure of the G $\alpha$ s/G $\beta$  $\gamma$ / $\beta$ 2AR/Nb35 complex (PDB: 3SN6). A critical phenylalanine residue from Nb35 (orange, cartoon) engages the hydrophobic pocket between the switch II region and the  $\alpha$ 3 helix. G $\alpha$ s is shown as surface. Nb35 is shown as cartoon.
- (J) Activation of AC by G $\alpha$ s oncogenic mutants was inhibited by GN13. AC activity was normalized to DMSO control group (100%). Mean  $\pm$  SD, n = 3.
- (K) Structural basis for nucleotide-state-selective binding of GN13 to G $\alpha$ s. In G $\alpha$ s/GDP (yellow), switch II is partially disordered, which disrupts polar contacts with GN13 and creates extensive steric hindrance. In particular, R232 of switch II (shown in space filling) is predicted to create a steric clash with I8 of GN13.
- (L) GN13 inhibited PPI between G $\alpha$ s WT and AC. This inhibitory effect was significantly diminished by the S275L mutation (red). Mean  $\pm$  SD, n = 3.

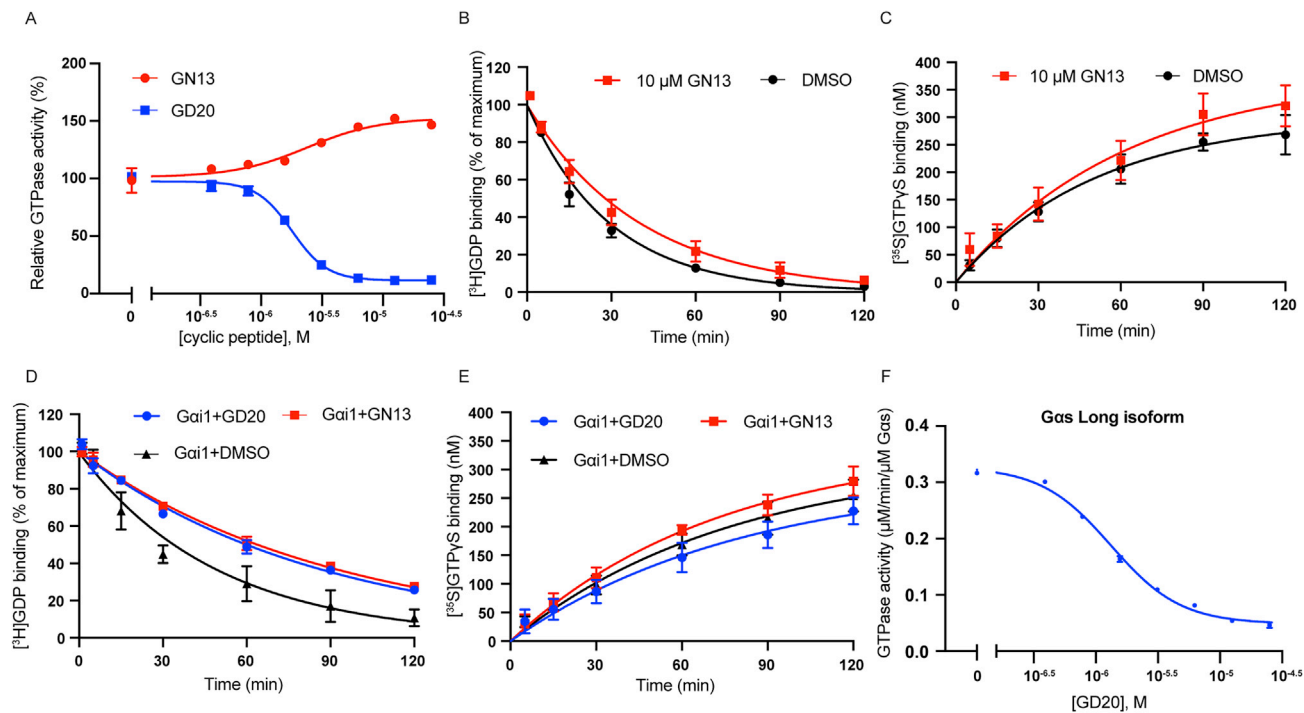

**Figure S4. GN13 and GD20 modulate  $G\alpha_s$  GTPase activity in a  $G\alpha_s$ -specific manner, related to Figure 4**

- (A)  $G\alpha_s$  steady-state GTPase activity was modulated by GN13 and GD20. Mean  $\pm$  SD,  $n = 2$ .  
 (B) GDP dissociation from  $G\alpha_s$  in the presence (red) or absence (black) of 10  $\mu\text{M}$  GN13 were measured. Mean  $\pm$  SD,  $n = 3$ .  
 (C) GTP $\gamma$ S binding to  $G\alpha_s$  in the presence (red) or absence (black) of 10  $\mu\text{M}$  GN13 were measured. Mean  $\pm$  SD,  $n = 3$ .  
 (D) GDP dissociation from  $G\alpha_i1$  in the presence of 10  $\mu\text{M}$  GN13 (red), or 10  $\mu\text{M}$  GD20 (blue) or DMSO (black) were measured. Mean  $\pm$  SD,  $n = 3$ .  
 (E) GTP $\gamma$ S binding to  $G\alpha_i1$  in the presence of 10  $\mu\text{M}$  GN13 (red), or 10  $\mu\text{M}$  GD20 (blue) or DMSO (black) were measured. Mean  $\pm$  SD,  $n = 3$ .  
 (F) Steady-state GTPase activities of short and long isoforms of  $G\alpha_s$  were inhibited by GD20. Mean  $\pm$  SD,  $n = 2$ .



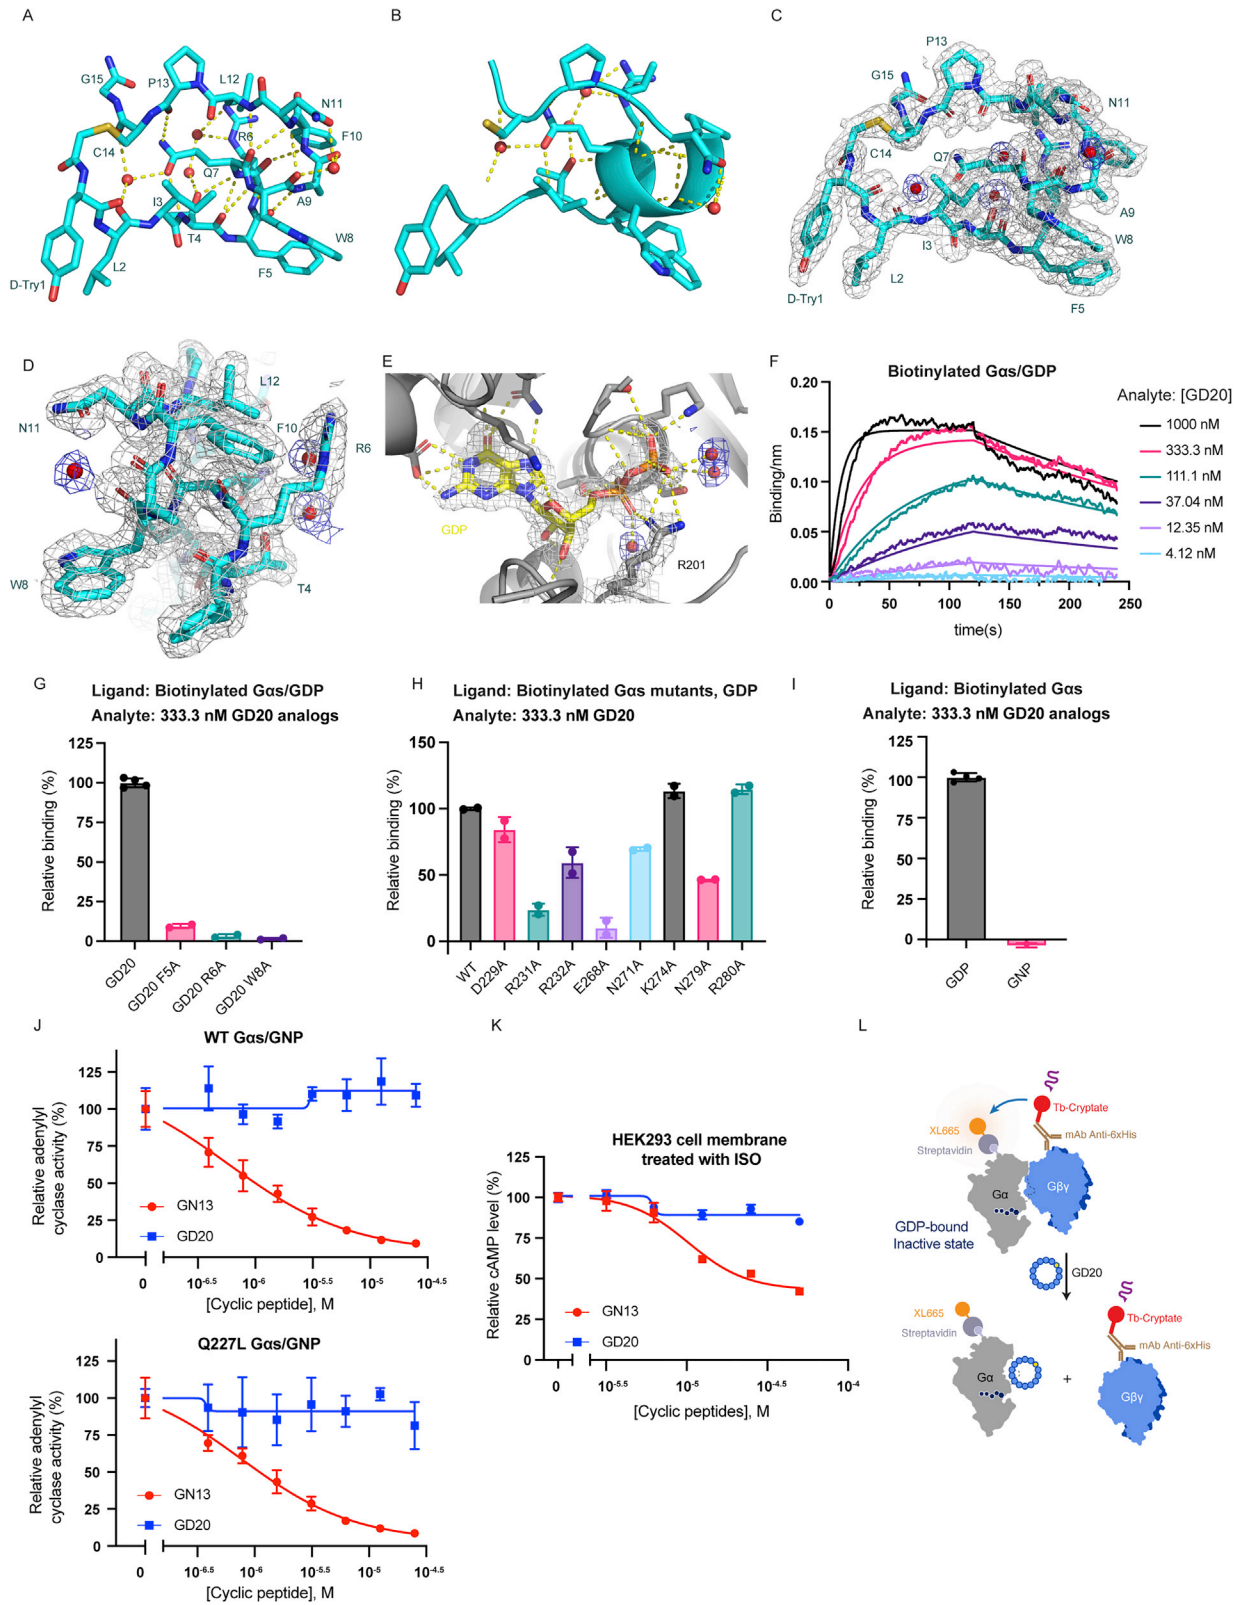



**Figure S5. GD20 specifically inhibits G $\alpha$ s through binding to a crystallographically defined pocket, related to Figure 5**

(A and B) GD20 adopts a highly ordered three-dimensional structure through an H-bond network. GD20 is shown as cyan sticks (A) or cartoon (B). Four water molecules with well-defined electron density are shown as red spheres. H-bonds are represented by yellow dash lines.

(C and D) Electron density map of GD20. The *2mFo-DFc* electron density map of the structure is contoured at 1.0  $\sigma$  and colored gray (GD20) and blue (Water), respectively.

(E) Electron density map of GDP. GDP and the side chain of R201 are shown as sticks. The Mg<sup>2+</sup> and two water molecules coordinated with the Mg<sup>2+</sup> are shown as green and red spheres, respectively. The *2mFo-DFc* electron density map of the structure is contoured at 1.0  $\sigma$ .

(F) Binding kinetics of GD20 to WT G $\alpha$ s/GDP were quantified using BLI. Biotinylated WT G $\alpha$ s/GDP was immobilized to give a relative intensity of 2–3 nm on streptavidin biosensors, following the same association/dissociation cycles described in Figure S2C. Binding signals were reference-subtracted. The assay was performed in duplicate, and the data represent one of the two replicates.

(G) Binding of GD20 analogs to WT G $\alpha$ s/GDP were quantified using BLI. Biotinylated WT GDP-bound G $\alpha$ s proteins were immobilized to give a relative intensity of 2–3 nm on streptavidin biosensors, following the same association/dissociation cycles described in Figure S2C. Binding signals were double referenced and normalized to G $\alpha$ s loading and GD20/G $\alpha$ s binding signal. Mean  $\pm$  SD, n = 2.

(H) Binding of GD20 to different GDP-bound G $\alpha$ s mutants were quantified using BLI. Biotinylated GDP-bound G $\alpha$ s proteins were immobilized to give a relative intensity of 2–3 nm on streptavidin biosensors, following the same association/dissociation cycles described in Figure S2C. Binding signals were double referenced and normalized to G $\alpha$ s loading and GDP/WT G $\alpha$ s binding signal. Mean  $\pm$  SD, n = 2.

(I) Binding of GD20 analogs to WT GDP-bound or GNP-bound G $\alpha$ s were quantified using BLI. Biotinylated WT G $\alpha$ s proteins were immobilized to give a relative intensity of 2–3 nm on streptavidin biosensors, following the same association/dissociation cycles described in Figure S2C. Binding signals were double referenced and normalized to G $\alpha$ s loading and GD20/GDP-bound G $\alpha$ s binding signal. Mean  $\pm$  SD, n = 2.

(J) Activation of AC by GNP-bound WT G $\alpha$ s or GNP-bound G $\alpha$ s oncogenic mutant Q227L were inhibited by GN13 but not GD20. AC activity was normalized to DMSO control group (100%). Mean  $\pm$  SD, n = 3.

(K) GD20 did not inhibit ISO-stimulated G $\alpha$ s activation in HEK293 cell membranes. Mean  $\pm$  SD, n = 3.

(L) Illustration of inactive-state binders inhibiting PPI between G $\alpha$ s/GDP and G $\beta\gamma$ (C68S).

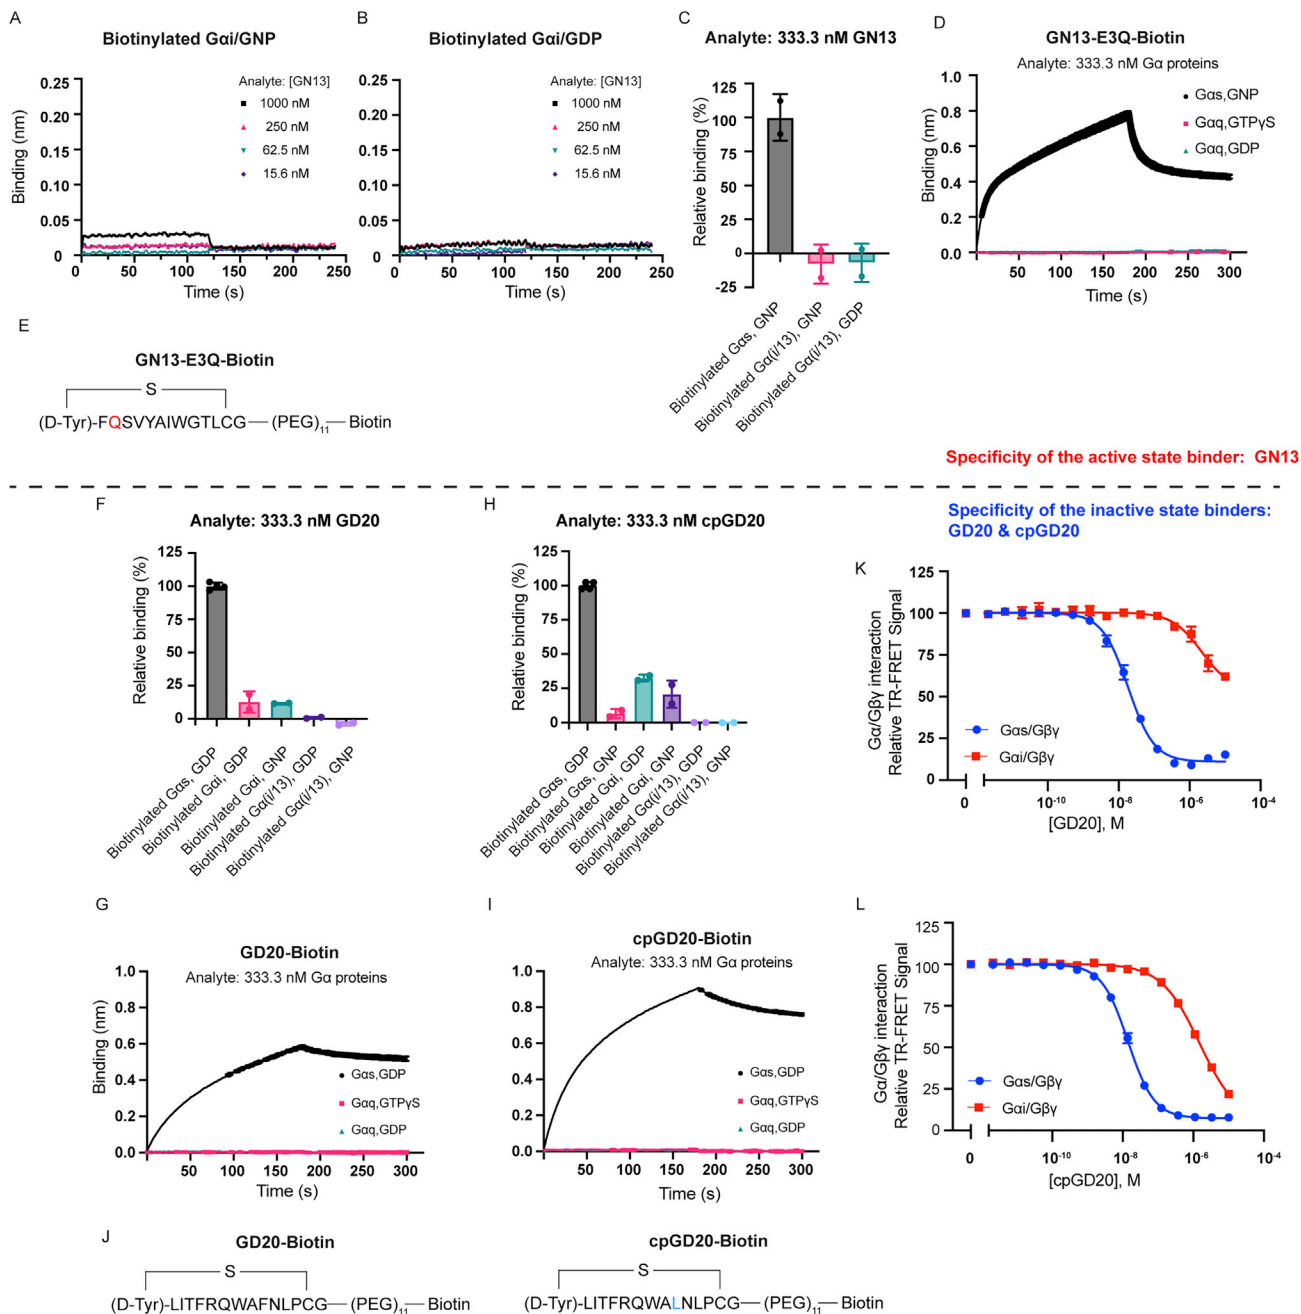

**Figure S6. G protein class-specificity of GN13 and GD20, related to Figure 6**

(A and B) Binding kinetics of GN13 to  $G\alpha_i$  were quantified using BLI. Biotinylated  $G\alpha_i$  proteins were immobilized to give a relative intensity of 2–3 nm on streptavidin biosensors, following the same association/dissociation cycles described in Figure S2C. Binding signals were reference-subtracted. The assay was performed in duplicate, and the data represent one of the two replicates.

(C) Binding of GN13 to  $G\alpha_s$  and  $G\alpha(i/13)$  were quantified using BLI. The substitution of the N-terminal helix of  $G\alpha_i1$  for the corresponding region of  $G\alpha_{i13}$  generated soluble chimeric  $G\alpha(i/13)$  protein. The N-terminal helix substitution is far away from GN13 binding interface, therefore will not influence its binding. Biotinylated  $G\alpha$  proteins were immobilized to give a relative intensity of 2–3 nm on streptavidin biosensors, following the same association/dissociation cycles described in Figure S2C. Binding signals were double referenced and normalized to  $G\alpha$  protein loading and GN13/GNP-bound  $G\alpha_s$  binding signal. Mean  $\pm$  SD,  $n = 2$ .

(D) The Avi tagged  $G\alpha_q$  was insoluble (data not shown), therefore, biotinylated GN13-E3Q was immobilized to give a relative intensity of 0.2–0.3 nm on streptavidin biosensors. GN13-E3Q was chosen to simplify chemical synthesis of biotinylated cyclic peptides. Binding kinetics of untagged  $G\alpha_s$  and  $G\alpha_q$  to immobilized GN13-E3Q were quantified using BLI. Association ( $t = 0$ –180 s) and dissociation ( $t = 180$ –300 s) cycles of  $G\alpha$  proteins were started by dipping sensors into  $G\alpha$  protein solutions and control buffer. Binding signals were double referenced. Mean  $\pm$  SD,  $n = 2$ .

(E) Design of biotinylated GN13-E3Q.

(legend continued on next page)

---

(F and H) Binding of GD20 (F) or cpGD20 (H) to  $G_{\alpha s}$ ,  $G_{\alpha i/13}$  and  $G_{\alpha i}$  were quantified using BLI. Biotinylated  $G_{\alpha}$  proteins were immobilized to give a relative intensity of 2–3 nm on streptavidin biosensors, following the same association/dissociation cycles described in Figure S2C. Binding signals were double referenced and normalized to  $G_{\alpha}$  protein loading and the GD20(or cpGD20)/GDP-bound  $G_{\alpha s}$  binding signal. Mean  $\pm$  SD, n = 2.

(G and I) Biotinylated GD20 (G) or Biotinylated cpGD20 (I) was immobilized to give a relative intensity of 0.3–0.4 nm on streptavidin biosensors. Binding kinetics of untagged  $G_{\alpha s}$  and  $G_{\alpha q}$  to immobilized GD20 or cpGD20 were quantified using BLI. Association (t = 0–180 s) and dissociation (t = 180–300 s) cycles of  $G_{\alpha}$  proteins were started by dipping sensors into  $G_{\alpha}$  protein solutions and control buffer. Binding signals were double referenced. Mean  $\pm$  SD, n = 2.

(J) Design of biotinylated GD20 and biotinylated cpGD20 (GD20-F10L).

(K) GD20 inhibited PPI between  $G_{\alpha s}$ /GDP and  $G\beta\gamma$ (C68S). GD20 was 100-fold more selective for  $G_{\alpha s}$  than  $G_{\alpha i}$ . Mean  $\pm$  SD, n = 3.

(L) cpGD20 inhibited PPI between  $G_{\alpha s}$ /GDP and  $G\beta\gamma$ (C68S). cpGD20 was nearly 100-fold more selective for  $G_{\alpha s}$  than  $G_{\alpha i}$ . Mean  $\pm$  SD, n = 3.

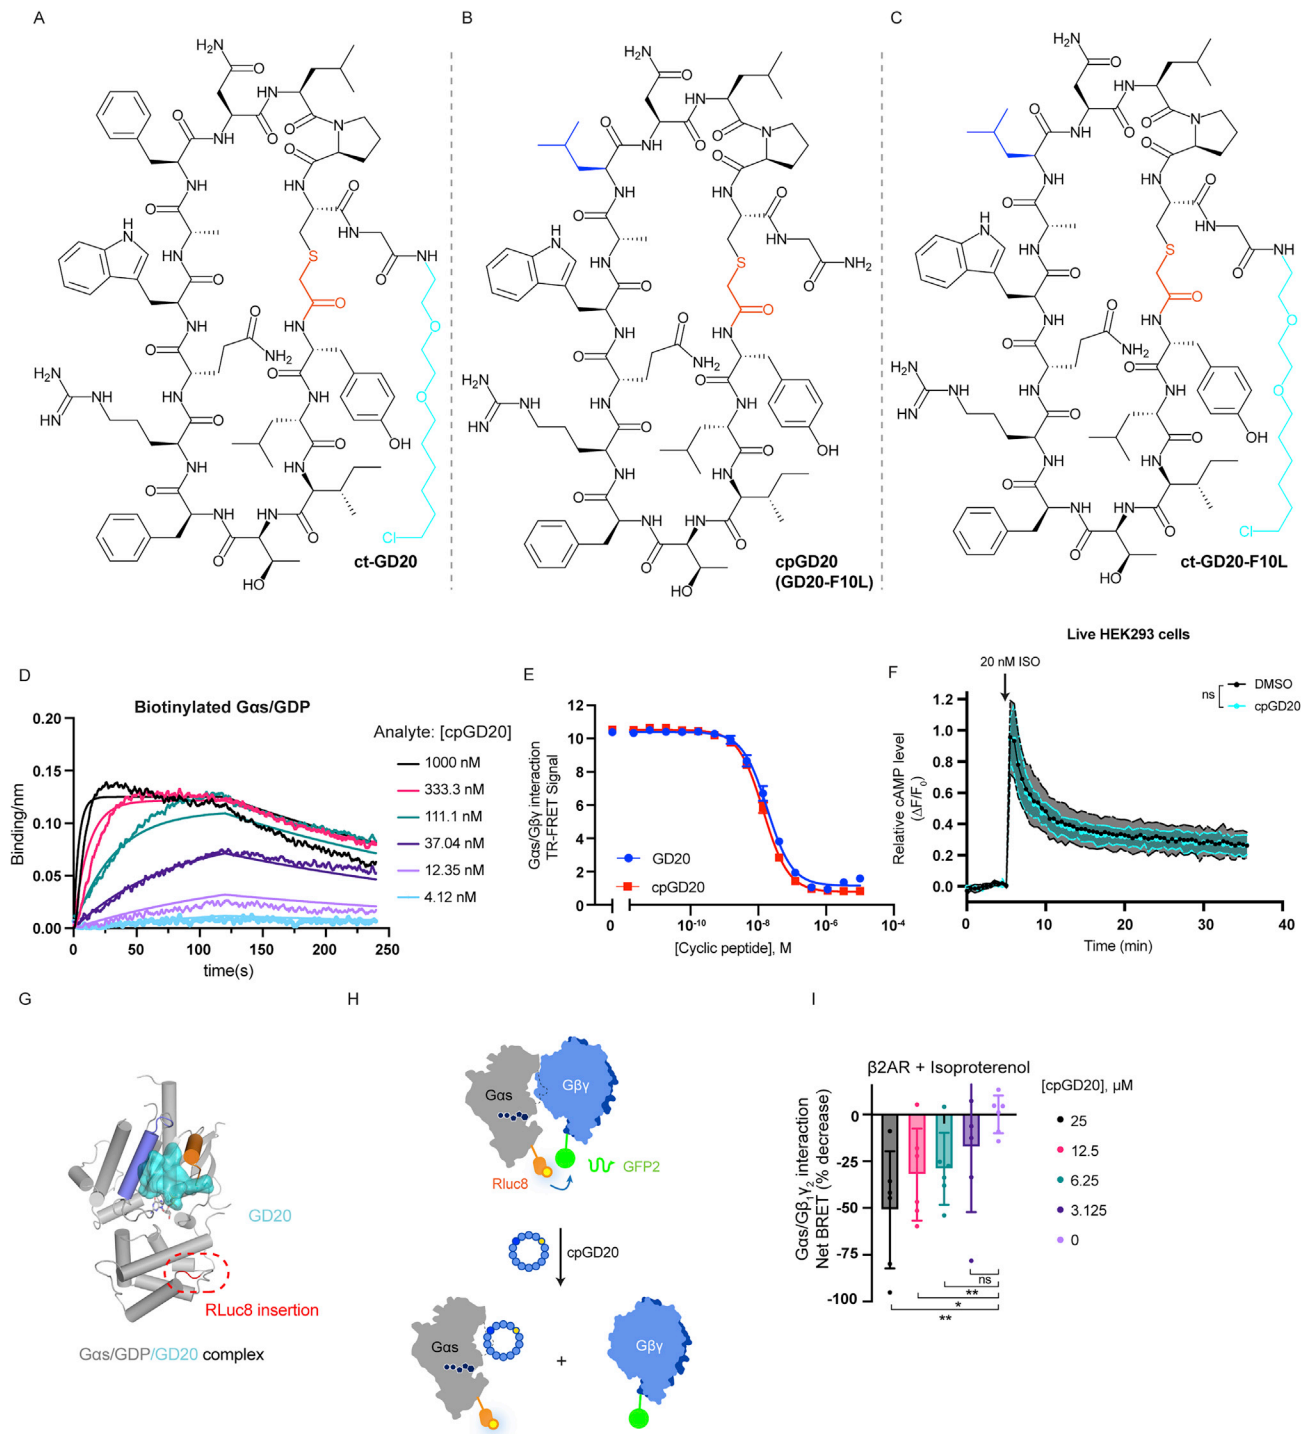

**Figure S7. A cell-permeable GD20 analog, cpGD20, is a dual-effect G protein modulator, related to Figure 7**

(A–C) Structure of derivatized cyclic peptides. (A) ct-GD20 (B) cpGD20 (GD20-F10L) (C) ct-GD20-F10L.

(D) Binding kinetics of cpGD20 to WT *Gas*/GDP were quantified using BLI. Biotinylated WT *Gas*/GDP was immobilized to give a relative intensity of 2–3 nm on streptavidin biosensors, following the same association/dissociation cycles described in Figure S2C. Binding signals were reference-subtracted. The assay was performed in duplicate, and the data represent one of the two replicates.

(E) cpGD20 inhibited PPI between *Gas*/GDP and Gβγ(C68S). Mean ± SD, n = 3.

(legend continued on next page)

---

(F) Pretreatment with cpGD20 for 24 h did not inhibited ISO-stimulated cAMP production in live HEK293 cells. Mean  $\pm$  SD, n = 3. Two-tailed unpaired t tests (data after 5min). ns p > 0.05.

(G) The GD20/G $\alpha$ s complex structure provides structural basis for the Rluc8 insertion. Rluc8 is inserted between  $\alpha$ B and  $\alpha$ C helices.

(H) Illustration of cpGD20 inhibiting PPI between G $\alpha$ sShort-Rluc and G $\beta$ 1/GFP2- $\gamma$ 2 in a BRET2 assay.

(I) cpGD20 inhibited G $\alpha$ s/G $\beta$  $\gamma$  reassociation in HEK293 cells in a dose dependent manner. G $\alpha$ s/G $\beta$  $\gamma$  dissociation was measured by BRET2 signal reduction after 1 nM ISO application. BRET signal was normalized to cells that were not treated with ISO and the percentage decrease was calculated based on the net BRET2 signal at [cpGD20] = 0  $\mu$ M. Mean  $\pm$  SD, n = 6. Two-tailed unpaired t tests, \*p < 0.05, \*\*p < 0.01, ns p > 0.05.
