# Supplementary material for: State-selective modulation of heterotrimeric Gαs signaling with macrocyclic peptides
Source: PubMed Central journal article supplement (PMC9747239; doi:10.1016/j.cell.2022.09.019), 2022-09-27
Supplement: NIHMS1837800-supplement-MMC1.pdf [file NIHMS1837800-supplement-MMC1.pdf]

Cell, Volume 185

## Supplemental information

### State-selective modulation of heterotrimeric G $\alpha$ s signaling with macrocyclic peptides

Shizhong A. Dai, Qi Hu, Rong Gao, Emily E. Blythe, Kouki K. Touhara, Hayden Peacock, Ziyang Zhang, Mark von Zastrow, Hiroaki Suga, and Kevan M. Shokat

**Table S1: Data collection and refinement statistics for the Gas/GppNHp/GN13 complex. Related to Figure 3**

| Gas/GppNHp/GN13 complex                                                            |                                             |
|------------------------------------------------------------------------------------|---------------------------------------------|
| <b>Data collection</b>                                                             |                                             |
| Space group                                                                        | P 21 21 21                                  |
| Cell dimensions                                                                    |                                             |
| <i>a</i> , <i>b</i> , <i>c</i> (Å)                                                 | 68.905, 78.332, 80.043                      |
| $\alpha$ , $\beta$ , $\gamma$ (°)                                                  | 90, 90, 90                                  |
| Resolution (Å)                                                                     | 50.00-1.57 (1.60-1.57) <sup>a</sup>         |
| <i>R</i> <sub>merge</sub> , <i>R</i> <sub>meas</sub> , and <i>R</i> <sub>pim</sub> | 0.074 (1.040), 0.086 (0.972), 0.023 (0.405) |
| <i>I</i> / $\sigma$ ( <i>I</i> )                                                   | 27.3 (1.32)                                 |
| <i>CC</i> <sub>1/2</sub>                                                           | 0.997 (0.783)                               |
| Completeness (%)                                                                   | 96.9 (71.2)                                 |
| Total reflections                                                                  | 58703                                       |
| Unique reflections                                                                 | 57627                                       |
| Redundancy                                                                         | 12.4 (4.0)                                  |
| <b>Refinement</b>                                                                  |                                             |
| Resolution (Å)                                                                     | 43.45-1.574                                 |
| No. reflections                                                                    | 51161                                       |
| <i>R</i> <sub>work</sub>                                                           | 0.1970                                      |
| <i>R</i> <sub>free</sub>                                                           | 0.2291                                      |
| No. atoms                                                                          |                                             |
| Protein                                                                            | 3079                                        |
| Ligand/ion (specify/describe)                                                      | 44                                          |
| Water                                                                              | 132                                         |
| <i>B</i> factors                                                                   |                                             |
| Protein                                                                            | 21.98                                       |
| Ligand/ion                                                                         | 13.41                                       |
| Water                                                                              | 22.43                                       |
| R.m.s. deviations                                                                  |                                             |
| Bond lengths (Å)                                                                   | 0.014                                       |
| Bond angles (°)                                                                    | 1.39                                        |
| Ramachandran analysis                                                              |                                             |
| Favored (%)                                                                        | 98.91                                       |
| Allowed (%)                                                                        | 0.82                                        |
| Outliers (%)                                                                       | 0.27                                        |
| Rotamer outliers (%)                                                               | 0.60                                        |
| Clashscore                                                                         | 3.57                                        |

<sup>a</sup> Values in parentheses are for highest-resolution shell.

**Table S2: Data collection and refinement statistics for the Gas/GDP/GD20 complex. Related to Figure 5**

| Gas/GDP/GD20 complex                                                               |                                             |
|------------------------------------------------------------------------------------|---------------------------------------------|
| <b>Data collection</b>                                                             |                                             |
| Space group                                                                        | P1                                          |
| Cell dimensions                                                                    |                                             |
| <i>a</i> , <i>b</i> , <i>c</i> (Å)                                                 | 58.105, 81.771, 76.912                      |
| $\alpha$ , $\beta$ , $\gamma$ (°)                                                  | 81.266, 83.844, 90.698                      |
| Resolution (Å)                                                                     | 50.00-1.95 (1.98-1.95) <sup>a</sup>         |
| <i>R</i> <sub>merge</sub> , <i>R</i> <sub>meas</sub> , and <i>R</i> <sub>pim</sub> | 0.081 (1.202), 0.113 (1.260), 0.059 (0.762) |
| <i>I</i> / $\sigma$ ( <i>I</i> )                                                   | 11.40 (0.815)                               |
| <i>CC</i> <sub>1/2</sub>                                                           | 0.991 (0.422)                               |
| Completeness (%)                                                                   | 97.0 (87.7)                                 |
| Total reflections                                                                  | 99153                                       |
| Unique reflections                                                                 | 95974                                       |
| Redundancy                                                                         | 3.4 (2.0)                                   |
| <b>Refinement</b>                                                                  |                                             |
| Resolution (Å)                                                                     | 48.54-1.95                                  |
| No. reflections                                                                    | 82224                                       |
| <i>R</i> <sub>work</sub>                                                           | 0.2178                                      |
| <i>R</i> <sub>free</sub>                                                           | 0.2580                                      |
| No. atoms                                                                          |                                             |
| Protein                                                                            | 11279                                       |
| Ligand/ion                                                                         | 132                                         |
| Water                                                                              | 329                                         |
| <i>B</i> factors                                                                   |                                             |
| Protein                                                                            | 29.36                                       |
| Ligand/ion                                                                         | 18.22                                       |
| Water                                                                              | 21.27                                       |
| R.m.s. deviations                                                                  |                                             |
| Bond lengths (Å)                                                                   | 0.004                                       |
| Bond angles (°)                                                                    | 0.70                                        |
| Ramachandran analysis                                                              |                                             |
| Favored (%)                                                                        | 97.45                                       |
| Allowed (%)                                                                        | 2.25                                        |
| Outliers (%)                                                                       | 0.30                                        |
| Rotamer outliers (%)                                                               | 0.98                                        |
| Clashscore                                                                         | 3.86                                        |

<sup>a</sup> Values in parentheses are for highest-resolution shell.

**Table S3: Kinetics analysis of cyclic peptides-Gas interaction by BLI. Related to Figure 2D, 4C, S2, S5 and S7**

|                 | $K_D$ (nM)     | $K_{on}$ ( $M^{-1}s^{-1}$ )             | $K_{off}$ ( $s^{-1}$ )                        |
|-----------------|----------------|-----------------------------------------|-----------------------------------------------|
| GN13/GppNHp/Gas | $190 \pm 16$   | $2.71 \times 10^5 \pm 2.13 \times 10^4$ | $5.13 \times 10^{-2} \pm 1.31 \times 10^{-3}$ |
| GD20/GDP/Gas    | $31.4 \pm 0.7$ | $1.09 \times 10^5 \pm 1.28 \times 10^3$ | $3.43 \times 10^{-3} \pm 6.97 \times 10^{-5}$ |
| cpGD20/GDP/Gas  | $14.5 \pm 0.4$ | $2.47 \times 10^5 \pm 3.71 \times 10^3$ | $3.58 \times 10^{-3} \pm 8.50 \times 10^{-5}$ |

5 **Table S4: Chemical stability of Gas binding cyclic peptides in DMEM with 10% FBS. Related to STAR Methods**

|        | Half-life (hour) <sup>a</sup> |
|--------|-------------------------------|
| GN13   | >76                           |
| GD20   | >142                          |
| cpGD20 | 37.37 - 50.32                 |

<sup>a</sup> Values represent 95% confidence intervals  
The data were analyzed from two independent replicates.

10

**Table S5: Plasma stability of Gas binding cyclic peptides. Related to STAR Methods**

|        | Half-life (hour) <sup>a</sup> |
|--------|-------------------------------|
| GN13   | >82                           |
| GD20   | 16.37 - 27.13                 |
| cpGD20 | 7.16 - 12.74                  |

<sup>a</sup> Values represent 95% confidence intervals  
The data were analyzed from two independent replicates.

15
